# Supplementary material for: Association of Visiting the Physiotherapist with Mortality in the Spanish General Population: A Population-Based Cohort Study
Source: MDPI journal article supplement (doi:10.3390/medicina59122187), 2023-12-16
Supplement: s1 [file s1]

## Supplemental Material: Association of Visiting the Physiotherapist with Mortality in the Spanish General Population: A Population-Based Cohort Study

Table S1. Details of the explanatory variables

| VARIABLE                       | Description                                                                                                                        | Code Question Survey | Response options | CATEGORIE S of response                                                                                                                                                                                                                                       |
|--------------------------------|------------------------------------------------------------------------------------------------------------------------------------|----------------------|------------------|---------------------------------------------------------------------------------------------------------------------------------------------------------------------------------------------------------------------------------------------------------------|
| Autonomous community residence | This variable is not coded in the National Health Survey 20112012. The enumerator has accessed this variable from other registers. |                      |                  | Andalucía<br><br>Aragón<br>Asturias<br>Baleares<br>Canarias<br>Cantabria<br>Castilla y León<br>Castilla-La Mancha<br>Cataluña<br>Comunitat Valenciana<br>Extremadura<br>Galicia<br>Madrid<br>Murcia<br>Navarra<br>País Vasco<br>Rioja, La<br>Ceuta<br>Melilla |
| Sex                            |                                                                                                                                    | Proxy_3b             | 1.- Man          | Man                                                                                                                                                                                                                                                           |

|                     |                                                                                                                                                                                                                                                                                                                                                                                                                                                                                                                                                                                            |         |            |                                                                                      |
|---------------------|--------------------------------------------------------------------------------------------------------------------------------------------------------------------------------------------------------------------------------------------------------------------------------------------------------------------------------------------------------------------------------------------------------------------------------------------------------------------------------------------------------------------------------------------------------------------------------------------|---------|------------|--------------------------------------------------------------------------------------|
|                     |                                                                                                                                                                                                                                                                                                                                                                                                                                                                                                                                                                                            |         | 2.-Woman   | Woma                                                                                 |
| Age group           | Age has been categorised into the intervals shown in the last column, with a total of six intervals.                                                                                                                                                                                                                                                                                                                                                                                                                                                                                       | Proxy_4 | Free field | < 35 years<br>35-54 years<br>55-64 years<br>65-74 years<br>75-84 years<br>≥ 85 years |
| Occupational social | <p>The definition proposed for each response category is as follows:</p> <p>I. Managers in the Public Administration and in companies with 10 or more employees. Professions associated with second and third cycle university degrees.</p> <p>II. Managers of companies with fewer than 10 employees. Professions associated with a first-cycle university degree. Technicians and support professionals. Artists and athletes.</p> <p>IIIa. Administrative type employees and administrative and financial management support professionals. Personal and security services workers.</p> |         |            | Social class I class contain a code in the variable constructed by NSI               |

|                  |                                                                                                                                                                                                                 |                       |                                                                      |                                                                                                                                     |
|------------------|-----------------------------------------------------------------------------------------------------------------------------------------------------------------------------------------------------------------|-----------------------|----------------------------------------------------------------------|-------------------------------------------------------------------------------------------------------------------------------------|
|                  | <p>IIIb. Self-employed workers</p> <p>IIIc. Supervisors of manual workers</p> <p>IVa. Skilled manual workers</p> <p>IVb Semi-skilled manual workers IVb.</p>                                                    |                       |                                                                      |                                                                                                                                     |
|                  | V. Unskilled workers.                                                                                                                                                                                           |                       |                                                                      | <p>Social class II</p> <p>Social class III</p> <p>Social class IV</p> <p>Social class V</p> <p>Social class VI</p> <p>No record</p> |
| BMI              | For the calculation of this variable, the answers to questions 102 and 103 contained in the Health Determinants Module (R-Physical Characteristics) of the National Health Survey 2011-2012 will be considered. | <p>102</p> <p>103</p> | Free field                                                           | <p>Normal</p> <p>Overweight</p> <p>Obesity</p> <p>NR/DK</p>                                                                         |
| Country of birth | The response category is of the nominal type for this variable.                                                                                                                                                 | 2                     | <p>Spanish</p> <p>Foreign</p> <p>Doesn't know</p> <p>No response</p> | <p>Spain</p> <p>Foreign</p>                                                                                                         |

|                     |                                                                                                                                                                                                                                  |     |                                                                                                                                                                           |                                                                          |
|---------------------|----------------------------------------------------------------------------------------------------------------------------------------------------------------------------------------------------------------------------------|-----|---------------------------------------------------------------------------------------------------------------------------------------------------------------------------|--------------------------------------------------------------------------|
| Marital status      | The response category is of the nominal type for this variable.                                                                                                                                                                  | 4   | Single<br>Married<br>Widowed<br>Legally separated<br>Divorced<br>Doesn't know<br>No response                                                                              | Single<br>Married<br>Widowed<br>Separated<br>Divorced                    |
| Education Level     | .This variable is not coded in the National Health Survey 2011-2012. .<br><br>The enumerator has accessed this variable from other registers. This variable has been categorised into the survey modes noted in the last column. |     |                                                                                                                                                                           | University<br>VT<br>Baccalaureate<br>Secondary school<br>Primary or less |
| Tobacco consumption | The response category is of the nominal type for this variable. The response categories are mutually exclusive. See in the last column.                                                                                          | 105 | Yes, smokes daily<br>Smokes but not daily<br>Doesn't smoke now, but has smoked before<br>Doesn't smoke nor has ever smoked on a fair basis<br>Doesn't know<br>No response | Never<br><br><br><br><br><br>Ex-smoker<br>Smoker                         |
| Exposure to tobacco |                                                                                                                                                                                                                                  | 117 | Never or hardly ever<br>Less than one hour a day<br>Between 1 and 5 hours a day<br>More than 5 hours a day                                                                | Never                                                                    |
| smoke               | The response category is of the frequency interval type for this variable. See in the last column.                                                                                                                               |     |                                                                                                                                                                           | < 1h/day<br><br><br><br><br><br>> 1h/day                                 |

|                     |                                                                                                                                         |     |                                                                                                                                                                                                      |                                                                                    |
|---------------------|-----------------------------------------------------------------------------------------------------------------------------------------|-----|------------------------------------------------------------------------------------------------------------------------------------------------------------------------------------------------------|------------------------------------------------------------------------------------|
| Alcohol risk        |                                                                                                                                         | 123 | <p>Everyday</p> <p>From 3 to 6 times a week</p> <p>From once to twice a week</p> <p>From twice to 3 times a month</p> <p>Once a month or less</p>                                                    | Doesn't drink                                                                      |
|                     | The response category is of the quantity range type for this variable. See in the last column.                                          |     |                                                                                                                                                                                                      | <p>Low risk &lt; 20/40 gr</p> <p>Risk 20/40 – 40/60 gr High risk &gt; 40/60 gr</p> |
| Tobacco consumption | The response category is of the nominal type for this variable. The response categories are mutually exclusive. See in the last column. | 105 | <p>Yes, smokes daily</p> <p>Smokes but not daily</p> <p>Doesn't smoke now, but has smoked before</p> <p>Doesn't smoke nor has ever smoked on a fair basis</p> <p>Doesn't know</p> <p>No response</p> | <p>Never</p> <p>Ex-smoker</p> <p>Smoker</p>                                        |
| Exposure to tobacco |                                                                                                                                         | 117 | <p>Never or hardly ever</p> <p>Less than one hour a day</p> <p>Between 1 and 5 hours a day</p> <p>More than 5 hours a day</p>                                                                        | Never                                                                              |
| smoke               | The response category is of the frequency interval type for this variable. See in the last column.                                      |     |                                                                                                                                                                                                      | <p>&lt; 1h/day</p> <p>&gt; 1h/day</p>                                              |

|                     |                                                                                                |     |                                                                                                                                                                                                                                                                      |                                                                                                                      |
|---------------------|------------------------------------------------------------------------------------------------|-----|----------------------------------------------------------------------------------------------------------------------------------------------------------------------------------------------------------------------------------------------------------------------|----------------------------------------------------------------------------------------------------------------------|
| Alcohol risk        |                                                                                                | 123 | <p>Everyday</p> <p>From 3 to 6 times a week</p> <p>From once to twice a week</p> <p>From twice to 3 times a month</p> <p>Once a month or less</p>                                                                                                                    | Doesn't drink                                                                                                        |
|                     | The response category is of the quantity range type for this variable. See in the last column. |     |                                                                                                                                                                                                                                                                      | <p>Low risk &lt; 0/40 gr</p> <p>Risk 20/40 – 40/60 gr High risk &gt; 40/60 gr</p>                                    |
| Daily main activity | The response category is of the nominal type for this variable. See in the last column.        | 128 | <p>Sitting most of the day.</p> <p>Standing most of the day without much movement or effort.</p> <p>Walking, carrying some weight, making frequent movements.</p> <p>Performing tasks that require great physical effort.</p> <p>Doesn't know</p> <p>No response</p> | <p>Sitting most of the time</p> <p>Standing most of the time</p> <p>Walking with weight</p> <p>Tasks with effort</p> |

|                           |                                                                                                                 |     |                                                                                                                                                                                                                                        |                                                                                                                |
|---------------------------|-----------------------------------------------------------------------------------------------------------------|-----|----------------------------------------------------------------------------------------------------------------------------------------------------------------------------------------------------------------------------------------|----------------------------------------------------------------------------------------------------------------|
| Leisure physical activity | The response category is of the nominal type for this variable. See in the last column.                         | 129 | <p>I do exercise</p> <p>I do some physical or sports activity occasionally</p> <p>I do physical activity several times a month</p> <p>I do sports or physical training several times a week</p> <p>Doesn't know</p> <p>No response</p> | <p>Sedentary</p> <p>Occasional physical activity</p> <p>Frequent physical activity</p> <p>Sports training</p>  |
| Breakfast                 | The response category is of the nominal type for this variable. See in the last column.                         | 131 | <p>At home, before going out</p> <p>Away from home</p> <p>Don't usually have breakfast</p>                                                                                                                                             | <p>At home</p> <p>Away from home</p> <p>Don't usually have breakfast</p>                                       |
| Fruit consumption         | The response category for this variable is frequency intervals. See the frequency intervals in the last column. | 133 | Multiple choice table                                                                                                                                                                                                                  | <p>Daily</p> <p>&gt; 3 times/week</p> <p>once-twice/week</p> <p>&lt; once/week</p> <p>never or hardly ever</p> |

|                        |                                                                                                                 |     |                       |                                                                                                            |
|------------------------|-----------------------------------------------------------------------------------------------------------------|-----|-----------------------|------------------------------------------------------------------------------------------------------------|
| Vegetables consumption | The response category for this variable is frequency intervals. See the frequency intervals in the last column. | 133 | Multiple choice table | daily<br><br><br><br><br><br><br><br>> 3 times/week<br>once-twice/week < once/week<br>never or hardly ever |
| Legume consumption     | The response category for this variable is frequency intervals. See the frequency intervals in the last column. | 133 | Multiple choice table | daily<br><br><br><br><br><br><br><br>> 3 times/week<br>once-twice/week < once/week<br>never or hardly ever |
| Dairy consumption      | The response category for this variable is frequency intervals. See the frequency intervals in the last column. | 133 | Multiple choice table | daily<br>> 3 times/week<br>once-twice/week < once/week<br>n<br>ever o<br>ardly ever                        |
| Fast food              | The response category for this variable is frequency intervals. See the frequency intervals in the last column. | 133 | Multiple choice table | daily<br><br><br><br><br><br><br><br>> 3 times/week<br>once-twice/week < once/week<br>never or hardly ever |



|                       |                                                                                                                 |      |                                                                                                                               |                                                                                                                 |
|-----------------------|-----------------------------------------------------------------------------------------------------------------|------|-------------------------------------------------------------------------------------------------------------------------------|-----------------------------------------------------------------------------------------------------------------|
| Dental hygiene        | The response category for this variable is frequency intervals. See the frequency intervals in the last column. | 137  | Occasionally, not every day<br>Never<br>Once a day<br>Twice a day<br>Three or more times a day<br>Doesn't know<br>No response | 3 or more times<br><br><br><br><br>/ day twice/day<br><br><br><br>once/day<br><br><br><br>never or occasionally |
| Self-perceived health | The response category is of the nominal type for this variable. See in the last column.                         | 26.6 | Response scale                                                                                                                | Very good<br><br><br>Good<br><br>Fair<br><br>Bad<br><br>Very bad                                                |
| Any chronic disease   | The response category is of the nominal type for this variable. See in the last column.                         | 21 a | Yes<br><br>No<br><br>Doesn't know<br><br>No response                                                                          | No<br><br><br><br><br>Yes                                                                                       |

|                      |                                                                                         |      |                                          |                   |
|----------------------|-----------------------------------------------------------------------------------------|------|------------------------------------------|-------------------|
| AMI                  | The response category is of the nominal type for this variable. See in the last column. | 21 a | Yes<br>No<br>Doesn't know<br>No response | No<br><br><br>Yes |
| Other heart diseases | The response category is of the nominal type for this variable. See in the last column. | 21 a | Yes<br>No<br>Doesn't know<br>No response | No<br><br><br>Yes |
| Varicose veins       | The response category is of the nominal type for this variable. See in the last column. | 21 a | Yes<br>No<br>Doesn't know<br>No response | No<br><br><br>Yes |
| Osteoarthritis       | The response category is of the nominal type for this variable. See in the last column. | 21 a | Yes<br>No<br>Doesn't know<br>No response | No<br><br><br>Yes |

|                       |                                                                                         |      |                                          |                   |
|-----------------------|-----------------------------------------------------------------------------------------|------|------------------------------------------|-------------------|
| Chronic neck pain     | The response category is of the nominal type for this variable. See in the last column  | 21 a | Yes<br>No<br>Doesn't know<br>No response | No<br><br><br>Yes |
| Chronic low back pain | The response category is of the nominal type for this variable. See in the last column. | 21 a | Yes<br>No<br>Doesn't know<br>No response | No<br><br><br>Yes |
| Allergy               | The response category is of the nominal type for this variable. See in the last column. | 21 a | Yes<br>No<br>Doesn't know<br>No response | No<br><br><br>Yes |
| Asthma                | The response category is of the nominal type for this variable. See in the last column. | 21 a | Yes<br>No<br>Doesn't know<br>No response | No<br><br><br>Yes |
| COPD                  | The response category is of the nominal type for this variable. See in the last column. | 21 a | Yes<br>No<br>Doesn't know<br>No response | No<br><br><br>Yes |
| Diabetes Mellitus     | The response category is of the nominal type for this variable. See in the last column. | 21 a | Yes<br>No<br>Doesn't know<br>No response | No<br><br><br>Yes |
| Stomach ulcer         | The response category is of the nominal type for this variable. See in the last column. | 21 a | Yes<br>No<br>Doesn't know<br>No response | No<br><br><br>Yes |

|                      |                                                                                         |      |                                          |                   |
|----------------------|-----------------------------------------------------------------------------------------|------|------------------------------------------|-------------------|
| Urinary incontinence | The response category is of the nominal type for this variable. See in the last column. | 21 a | Yes<br>No<br>Doesn't know<br>No response | No<br><br><br>Yes |
| High cholesterol     | The response category is of the nominal type for this variable. See in the last column. | 21 a | Yes<br>No<br>Doesn't know<br>No response | No<br><br><br>Yes |
| Cataracts            | The response category is of the nominal type for this variable. See in the last column. | 21 a | Yes<br>No<br>Doesn't know<br>No response | No<br><br><br>Yes |
| Skin problems        | The response category is of the nominal type for this variable. See in the last column. | 21 a | Yes<br>No<br>Doesn't know<br>No response | No<br><br><br>Yes |
| Chronic constipation | The response category is of the nominal type for this variable. See in the last column. | 21 a | Yes<br>No<br>Doesn't know<br>No response | No<br><br><br>Yes |
| Cirrhosis            | The response category is of the nominal type for this variable. See in the last column. | 21 a | Yes<br>No<br>Doesn't know<br>No response | No<br><br><br>Yes |
| Depression           | The response category is of the nominal type for this variable. See in the last column. | 21 a | Yes<br>No<br>Doesn't know<br>No response | No<br><br><br>Yes |

|                       |                                                                                         |      |                                          |                   |
|-----------------------|-----------------------------------------------------------------------------------------|------|------------------------------------------|-------------------|
| Anxiety               | The response category is of the nominal type for this variable. See in the last column. | 21 a | Yes<br>No<br>Doesn't know<br>No response | No<br><br><br>Yes |
| Other mental problems | The response category is of the nominal type for this variable. See in the last column. | 21 a | Yes<br>No<br>Doesn't know<br>No response | No<br><br><br>Yes |
| Ictus                 | The response category is of the nominal type for this variable. See in the last column. | 21 a | Yes<br>No<br>Doesn't know<br>No response | No<br><br><br>Yes |
| Migraine              | The response category is of the nominal type for this variable. See in the last column. | 21 a |                                          | No<br><br><br>Yes |
| Haemorrhoids          | The response category is of the nominal type for this variable. See in the last column. | 21 a | Yes<br>No<br>Doesn't know<br>No response | No<br><br><br>Yes |
| Malignant tumours     | The response category is of the nominal type for this variable. See in the last column. | 21 a | Yes<br>No<br>Doesn't know<br>No response | No<br><br><br>Yes |
| Osteoporosis          | The response category is of the nominal type for this variable. See in the last column. | 21 a | Yes<br>No<br>Doesn't know<br>No response | No<br><br><br>Yes |

|                                       |                                                                                         |      |                                                                                     |                                                                                     |
|---------------------------------------|-----------------------------------------------------------------------------------------|------|-------------------------------------------------------------------------------------|-------------------------------------------------------------------------------------|
| Thyroid problems                      | The response category is of the nominal type for this variable. See in the last column. | 21 a | Yes<br>No<br>Doesn't know<br>No response                                            | No<br><br><br>Yes                                                                   |
| Injuries or accidents                 | The response category is of the nominal type for this variable. See in the last column. | 21 a | Yes<br>No<br>Doesn't know<br>No response                                            | No<br><br><br>Yes                                                                   |
| Accidents<br>(last year)              | The response category is of the nominal type for this variable. See in the last column. | 21 a | Yes<br>No<br>Doesn't know<br>No response                                            | No<br><br><br>Yes                                                                   |
| GHQ12 mental health                   | The response category is of the nominal type for this variable. See in the last column. | P.40 | Multiple choice table                                                               | Absence of psychopathology<br><br>Suspicion<br>Presence of psychopathology<br>NR/DK |
| Activity limitation<br>(last 2 weeks) | The response category is of the nominal type for this variable. See in the last column. | P.27 | Free field<br>Yes<br>No                                                             | No<br>Yes                                                                           |
| Bed rest<br>(last 2 weeks)            | The response category is of the nominal type for this variable. See in the last column. | P.28 | Free field<br>Yes<br>No<br>Doesn't know<br>No response                              | No<br><br><br>Yes                                                                   |
| Use of glasses or contact lenses      | The response category is of the nominal type for this variable. See in the last column. | 32   | Yes<br>No, never<br>I'm blind and I can't see at all<br>Doesn't know<br>No response | No<br><br><br><br>Yes                                                               |

Table S2. Descriptives of the sample and proportion of visits to the physiotherapist in the last year according to explicative variables.

|                                      |                         | Total |        | No Physiotherapy<br>visit (last year) |        | Physiotherapy<br>Visit (last year) |        |         |
|--------------------------------------|-------------------------|-------|--------|---------------------------------------|--------|------------------------------------|--------|---------|
|                                      |                         | n     | %      | n                                     | %      | n                                  | %      | p-value |
| Autonomous<br>community<br>residence | Andalucía               | 3659  | 17.9 % | 3418                                  | 93.4 % | 241                                | 6.6 %  | <0.001  |
|                                      | Aragón                  | 588   | 2.9 %  | 518                                   | 88.0 % | 71                                 | 12.0 % |         |
|                                      | Asturias                | 485   | 2.4 %  | 415                                   | 85.5 % | 70                                 | 14.5 % |         |
|                                      | Baleares                | 477   | 2.3 %  | 439                                   | 92.0 % | 38                                 | 8.0 %  |         |
|                                      | Canarias                | 931   | 4.6 %  | 827                                   | 88.9 % | 103                                | 11.1 % |         |
|                                      | Cantabria               | 263   | 1.3 %  | 252                                   | 95.9 % | 11                                 | 4.1 %  |         |
|                                      | Castilla y León         | 1143  | 5.6 %  | 1007                                  | 88.1 % | 136                                | 11.9 % |         |
|                                      | Castilla - La<br>Mancha | 918   | 4.5 %  | 846                                   | 92.1 % | 72                                 | 7.9 %  |         |
|                                      | Cataluña                | 3068  | 15.0 % | 2722                                  | 88.7 % | 347                                | 11.3 % |         |
|                                      | Comunitat<br>Valenciana | 2233  | 10.9 % | 1998                                  | 89.5 % | 235                                | 10.5 % |         |
|                                      | Extremadura             | 481   | 2.4 %  | 448                                   | 93.2 % | 33                                 | 6.8 %  |         |
|                                      | Galicia                 | 1254  | 6.1 %  | 1117                                  | 89.1 % | 137                                | 10.9 % |         |
|                                      | Madrid                  | 2804  | 13.7 % | 2435                                  | 86.8 % | 369                                | 13.2 % |         |
|                                      | Murcia                  | 649   | 3.2 %  | 560                                   | 86.3 % | 89                                 | 13.7 % |         |
|                                      | Navarra                 | 278   | 1.4 %  | 253                                   | 90.9 % | 25                                 | 9.1 %  |         |
|                                      | País Vasco              | 961   | 4.7 %  | 855                                   | 88.9 % | 107                                | 11.1 % |         |
|                                      | Rioja, La               | 141   | 0.7 %  | 128                                   | 90.9 % | 13                                 | 9.1 %  |         |

|                           |                          |       |        |      |        |      |        |                  |
|---------------------------|--------------------------|-------|--------|------|--------|------|--------|------------------|
|                           | Ceuta                    | 30    | 0.1 %  | 28   | 91.9 % | 2    | 8.1 %  |                  |
|                           | Melilla                  | 31    | 0.2 %  | 31   | 99.4 % | 0    | 0.6 %  |                  |
| Municipality size         | >500,000 inhab.          | 3373  | 16.5 % | 2980 | 88.4 % | 393  | 11.6 % | <b>&lt;0.001</b> |
|                           | Province capital         | 3333  | 16.3 % | 2985 | 89.6 % | 348  | 10.4 % |                  |
|                           | >100,000 inhab.          | 1992  | 9.8 %  | 1766 | 88.7 % | 226  | 11.3 % |                  |
|                           | 50,000 to 100,000 inhab. | 2055  | 10.1 % | 1869 | 90.9 % | 186  | 9.1 %  |                  |
|                           | 20,000 to 50,000 inhab.  | 3166  | 15.5 % | 2829 | 89.4 % | 337  | 10.6 % |                  |
|                           | 10,000 to 20,000 inhab.  | 2180  | 10.7 % | 1928 | 88.5 % | 252  | 11.5 % |                  |
|                           | <10,000 inhabitants      | 4298  | 21.1 % | 3940 | 91.7 % | 359  | 8.3 %  |                  |
| Sex                       | Man                      | 9942  | 48.7 % | 8946 | 90.0 % | 996  | 10.0 % | 0.196            |
|                           | Woman                    | 10455 | 51.3 % | 9350 | 89.4 % | 1105 | 10.6 % |                  |
| Age group                 | < 35 years               | 6020  | 29.5 % | 5429 | 90.2 % | 591  | 9.8 %  | <b>&lt;0.001</b> |
|                           | 35-54 years              | 7671  | 37.6 % | 6781 | 88.4 % | 890  | 11.6 % |                  |
|                           | 55-64 years              | 2685  | 13.2 % | 2367 | 88.1 % | 318  | 11.9 % |                  |
|                           | 65-74 years              | 2060  | 10.1 % | 1892 | 91.8 % | 168  | 8.2 %  |                  |
|                           | 75-84 years              | 1475  | 7.2 %  | 1364 | 92.5 % | 111  | 7.5 %  |                  |
|                           | >=85 years               | 485   | 2.4 %  | 464  | 95.6 % | 21   | 4.4 %  |                  |
| Occupational social class | Social class I           | 2185  | 10.7 % | 1869 | 85.5 % | 316  | 14.5 % | <b>&lt;0.001</b> |
|                           | Social class II          | 1498  | 7.3 %  | 1270 | 84.8 % | 228  | 15.2 % |                  |
|                           | Social class III         | 3646  | 17.9 % | 3192 | 87.6 % | 453  | 12.4 % |                  |
|                           | Social class IV          | 3046  | 14.9 % | 2738 | 89.9 % | 308  | 10.1 % |                  |
|                           | Social class V           | 6482  | 31.8 % | 5924 | 91.4 % | 558  | 8.6 %  |                  |
|                           | Social class VI          | 3003  | 14.7 % | 2811 | 93.6 % | 192  | 6.4 %  |                  |



|                          |                  |       |        |       |        |      |        |                  |
|--------------------------|------------------|-------|--------|-------|--------|------|--------|------------------|
|                          | No record        | 538   | 2.6 %  | 493   | 91.6 % | 45   | 8.4 %  |                  |
| BMI                      | Normal           | 9019  | 44.2 % | 7992  | 88.6 % | 1027 | 11.4 % | <b>&lt;0.001</b> |
|                          | Overweight       | 6803  | 33.4 % | 6090  | 89.5 % | 713  | 10.5 % |                  |
|                          | Obesity          | 3144  | 15.4 % | 2871  | 91.3 % | 272  | 8.7 %  |                  |
|                          | NR/DK            | 1431  | 7.0 %  | 1343  | 93.8 % | 88   | 6.2 %  |                  |
| Country of birth         | Spain            | 17470 | 85.7 % | 15513 | 88.8 % | 1957 | 11.2 % | <b>&lt;0.001</b> |
|                          | Foreign          | 2927  | 14.3 % | 2784  | 95.1 % | 143  | 4.9 %  |                  |
| Marital status           | Single           | 6573  | 32.2 % | 5900  | 89.8 % | 672  | 10.2 % | 0.002            |
|                          | Married          | 11398 | 55.9 % | 10205 | 89.5 % | 1193 | 10.5 % |                  |
|                          | Widowed          | 1460  | 7.2 %  | 1345  | 92.2 % | 115  | 7.8 %  |                  |
|                          | Separated        | 364   | 1.8 %  | 325   | 89.3 % | 39   | 10.7 % |                  |
|                          | Divorced         | 604   | 3.0 %  | 522   | 86.5 % | 82   | 13.5 % |                  |
| Education level          | University       | 3280  | 16.1 % | 2822  | 86.0 % | 458  | 14.0 % | <b>&lt;0.001</b> |
|                          | VT               | 3126  | 15.3 % | 2742  | 87.7 % | 384  | 12.3 % |                  |
|                          | Baccalaureate    | 2680  | 13.1 % | 2396  | 89.4 % | 284  | 10.6 % |                  |
|                          | Secondary school | 6848  | 33.6 % | 6179  | 90.2 % | 669  | 9.8 %  |                  |
|                          | Primary or less  | 4462  | 21.9 % | 4156  | 93.1 % | 306  | 6.9 %  |                  |
| Monthly household income | NR/DK            | 5441  | 26.7 % | 4924  | 90.5 % | 517  | 9.5 %  | <b>&lt;0.001</b> |
| (net)                    | > € 2251         | 3195  | 15.7 % | 2704  | 84.6 % | 491  | 15.4 % |                  |
|                          | € 1551-2250      | 3206  | 15.7 % | 2813  | 87.7 % | 393  | 12.3 % |                  |
|                          | € 1051-1550      | 3765  | 18.5 % | 3412  | 90.6 % | 354  | 9.4 %  |                  |
|                          | € 801-1050       | 2077  | 10.2 % | 1904  | 91.7 % | 173  | 8.3 %  |                  |
|                          | < € 800          | 2713  | 13.3 % | 2541  | 93.7 % | 172  | 6.3 %  |                  |
| Tobacco consumption      | Never            | 10908 | 53.5 % | 9868  | 90.5 % | 1040 | 9.5 %  | <b>&lt;0.001</b> |

|                           |                              |       |        |       |        |      |        |        |
|---------------------------|------------------------------|-------|--------|-------|--------|------|--------|--------|
|                           | Ex-smoker                    | 3971  | 19.5 % | 3512  | 88.4 % | 460  | 11.6 % |        |
|                           | Smoker                       | 5518  | 27.1 % | 4917  | 89.1 % | 601  | 10.9 % |        |
| Exposure to tobacco smoke | Never                        | 16250 | 79.7 % | 14594 | 89.8 % | 1656 | 10.2 % | 0.235  |
|                           | <1h/day                      | 1567  | 7.7 %  | 1386  | 88.5 % | 181  | 11.5 % |        |
|                           | >1h/day                      | 2581  | 12.7 % | 2318  | 89.8 % | 263  | 10.2 % |        |
| Alcohol risk              | Non-drinker                  | 10857 | 53.2 % | 9840  | 90.6 % | 1017 | 9.4 %  | <0.001 |
|                           | Low risk < 20/40 gr          | 9029  | 44.3 % | 7984  | 88.4 % | 1045 | 11.6 % |        |
|                           | Risk 20/40-40/60 gr          | 439   | 2.2 %  | 404   | 92.0 % | 35   | 8.0 %  |        |
|                           | High risk > 40/60 gr         | 72    | 0.4 %  | 69    | 95.3 % | 3    | 4.7 %  |        |
| Hours of sleep            | > 9h/day                     | 1226  | 6.0 %  | 1139  | 92.8 % | 88   | 7.2 %  | <0.001 |
|                           | 7-9h/day                     | 14643 | 71.8 % | 13219 | 90.3 % | 1424 | 9.7 %  |        |
|                           | <7h/day                      | 4528  | 22.2 % | 3939  | 87.0 % | 589  | 13.0 % |        |
| Daily main activity       | Sitting most of the time     | 8161  | 40.0 % | 7304  | 89.5 % | 856  | 10.5 % | 0.119  |
|                           | Standing most of the time    | 9199  | 45.1 % | 8250  | 89.7 % | 948  | 10.3 % |        |
|                           | Walking with weight          | 2481  | 12.2 % | 2254  | 90.8 % | 228  | 9.2 %  |        |
|                           | Strenuous tasks              | 556   | 2.7 %  | 489   | 87.8 % | 68   | 12.2 % |        |
| Leisure physical activity | Sedentary                    | 9051  | 44.4 % | 8282  | 91.5 % | 770  | 8.5 %  | <0.001 |
|                           | Occasional physical activity | 6735  | 33.0 % | 6110  | 90.7 % | 625  | 9.3 %  |        |
|                           | Frequent physical activity   | 2668  | 13.1 % | 2300  | 86.2 % | 368  | 13.8 % |        |
|                           | Sports training              | 1943  | 9.5 %  | 1605  | 82.6 % | 337  | 17.4 % |        |

|                        |                              |       |        |       |        |      |        |                  |
|------------------------|------------------------------|-------|--------|-------|--------|------|--------|------------------|
| Breakfast              | At home                      | 17288 | 84.8 % | 15536 | 89.9 % | 1752 | 10.1 % | 0.036            |
|                        | Away from home               | 2335  | 11.4 % | 2060  | 88.2 % | 275  | 11.8 % |                  |
|                        | Don't usually have breakfast | 774   | 3.8 %  | 701   | 90.5 % | 73   | 9.5 %  |                  |
| Fruit consumption      | Daily                        | 12427 | 60.9 % | 11039 | 88.8 % | 1387 | 11.2 % | <b>&lt;0.001</b> |
|                        | > 3 times/week               | 3957  | 19.4 % | 3611  | 91.3 % | 346  | 8.7 %  |                  |
|                        | 1-2 times/week               | 2274  | 11.1 % | 2055  | 90.4 % | 219  | 9.6 %  |                  |
|                        | < once/week                  | 787   | 3.9 %  | 724   | 92.0 % | 63   | 8.0 %  |                  |
|                        | Never or hardly ever         | 953   | 4.7 %  | 868   | 91.1 % | 85   | 8.9 %  |                  |
| Vegetables consumption | Daily                        | 9566  | 46.9 % | 8439  | 88.2 % | 1128 | 11.8 % | <b>&lt;0.001</b> |
|                        | > 3 times/week               | 6990  | 34.3 % | 6333  | 90.6 % | 657  | 9.4 %  |                  |
|                        | 1-2 times/week               | 2761  | 13.5 % | 2553  | 92.5 % | 208  | 7.5 %  |                  |
|                        | < once/week                  | 690   | 3.4 %  | 618   | 89.6 % | 72   | 10.4 % |                  |
|                        | Never or hardly ever         | 390   | 1.9 %  | 355   | 91.0 % | 35   | 9.0 %  |                  |
| Legume consumption     | Daily                        | 312   | 1.5 %  | 293   | 93.8 % | 19   | 6.2 %  | <b>&lt;0.001</b> |
|                        | > 3 times/week               | 4738  | 23.2 % | 4325  | 91.3 % | 413  | 8.7 %  |                  |
|                        | 1-2 times/week               | 12161 | 59.6 % | 10871 | 89.4 % | 1289 | 10.6 % |                  |
|                        | < once/week                  | 2400  | 11.8 % | 2105  | 87.7 % | 294  | 12.3 % |                  |
|                        | Never or hardly ever         | 786   | 3.9 %  | 702   | 89.3 % | 84   | 10.7 % |                  |
| Dairy consumption      | Daily                        | 17231 | 84.5 % | 15410 | 89.4 % | 1822 | 10.6 % | 0.005            |
|                        | > 3 times/week               | 1557  | 7.6 %  | 1439  | 92.4 % | 118  | 7.6 %  |                  |
|                        | 1-2 times/week               | 702   | 3.4 %  | 638   | 90.8 % | 65   | 9.2 %  |                  |

|                       |                       |       |        |      |        |      |        |                  |
|-----------------------|-----------------------|-------|--------|------|--------|------|--------|------------------|
|                       | < once/week           | 348   | 1.7 %  | 312  | 89.8 % | 36   | 10.2 % |                  |
|                       | Never or hardly ever  | 559   | 2.7 %  | 498  | 89.1 % | 61   | 10.9 % |                  |
| Sweet consumption     | Daily                 | 5924  | 29.0 % | 5208 | 87.9 % | 716  | 12.1 % | <b>&lt;0.001</b> |
|                       | > 3 times/week        | 3105  | 15.2 % | 2822 | 90.9 % | 283  | 9.1 %  |                  |
|                       | 1-2 times/week        | 3708  | 18.2 % | 3359 | 90.6 % | 349  | 9.4 %  |                  |
|                       | < once/week           | 3278  | 16.1 % | 2935 | 89.5 % | 343  | 10.5 % |                  |
|                       | Never or hardly ever  | 4382  | 21.5 % | 3973 | 90.7 % | 409  | 9.3 %  |                  |
| Fast food             | Daily                 | 360   | 1.8 %  | 315  | 87.5 % | 45   | 12.5 % | 0.093            |
|                       | > 3 times/week        | 919   | 4.5 %  | 835  | 90.9 % | 84   | 9.1 %  |                  |
|                       | 1-2 times/week        | 4078  | 20.0 % | 3683 | 90.3 % | 395  | 9.7 %  |                  |
|                       | < once/week           | 4861  | 23.8 % | 4379 | 90.1 % | 482  | 9.9 %  |                  |
|                       | Never or hardly ever  | 10180 | 49.9 % | 9085 | 89.2 % | 1095 | 10.8 % |                  |
| Dental hygiene        | 3 or more times/day   | 7758  | 38.0 % | 6871 | 88.6 % | 887  | 11.4 % | <b>&lt;0.001</b> |
|                       | twice/day             | 6738  | 33.0 % | 6038 | 89.6 % | 700  | 10.4 % |                  |
|                       | once/day              | 4034  | 19.8 % | 3633 | 90.1 % | 401  | 9.9 %  |                  |
|                       | Never or occasionally | 1866  | 9.1 %  | 1754 | 94.0 % | 112  | 6.0 %  |                  |
| Self-perceived health | Very good             | 4396  | 21.6 % | 4126 | 93.9 % | 270  | 6.1 %  | <b>&lt;0.001</b> |
|                       | Good                  | 10413 | 51.0 % | 9396 | 90.2 % | 1017 | 9.8 %  |                  |
|                       | Fair                  | 4065  | 19.9 % | 3508 | 86.3 % | 557  | 13.7 % |                  |
|                       | Bad                   | 1224  | 6.0 %  | 1016 | 83.0 % | 209  | 17.0 % |                  |
|                       | Very bad              | 299   | 1.5 %  | 251  | 84.2 % | 47   | 15.8 % |                  |

|                       |     |       |        |       |        |      |        |                  |
|-----------------------|-----|-------|--------|-------|--------|------|--------|------------------|
| Any chronic disease   | No  | 11823 | 58.0 % | 10818 | 91.5 % | 1005 | 8.5 %  | <b>&lt;0.001</b> |
|                       | Yes | 8574  | 42.0 % | 7479  | 87.2 % | 1095 | 12.8 % |                  |
| AH                    | No  | 16119 | 79.0 % | 14425 | 89.5 % | 1693 | 10.5 % | 0.058            |
|                       | Yes | 4278  | 21.0 % | 3871  | 90.5 % | 407  | 9.5 %  |                  |
| AMI                   | No  | 19997 | 98.0 % | 17937 | 89.7 % | 2060 | 10.3 % | 0.960            |
|                       | Yes | 400   | 2.0 %  | 360   | 89.9 % | 41   | 10.1 % |                  |
| Other heart disease   | No  | 19226 | 94.3 % | 17233 | 89.6 % | 1993 | 10.4 % | 0.182            |
|                       | Yes | 1171  | 5.7 %  | 1063  | 90.8 % | 107  | 9.2 %  |                  |
| Varicose veins        | No  | 18087 | 88.7 % | 16310 | 90.2 % | 1777 | 9.8 %  | <b>&lt;0.001</b> |
|                       | Yes | 2310  | 11.3 % | 1987  | 86.0 % | 323  | 14.0 % |                  |
| Osteoarthritis        | No  | 16663 | 81.7 % | 15096 | 90.6 % | 1568 | 9.4 %  | <b>&lt;0.001</b> |
|                       | Yes | 3734  | 18.3 % | 3201  | 85.7 % | 532  | 14.3 % |                  |
| Chronic neck pain     | No  | 17053 | 83.6 % | 15621 | 91.6 % | 1432 | 8.4 %  | <b>&lt;0.001</b> |
|                       | Yes | 3344  | 16.4 % | 2675  | 80.0 % | 669  | 20.0 % |                  |
| Chronic low back pain | No  | 16427 | 80.5 % | 15020 | 91.4 % | 1408 | 8.6 %  | <b>&lt;0.001</b> |
|                       | Yes | 3970  | 19.5 % | 3277  | 82.6 % | 692  | 17.4 % |                  |
| Allergy               | No  | 17921 | 87.9 % | 16194 | 90.4 % | 1727 | 9.6 %  | <b>&lt;0.001</b> |
|                       | Yes | 2476  | 12.1 % | 2103  | 84.9 % | 373  | 15.1 % |                  |
| Asthma                | No  | 19359 | 94.9 % | 17381 | 89.8 % | 1979 | 10.2 % | 0.114            |
|                       | Yes | 1038  | 5.1 %  | 916   | 88.3 % | 122  | 11.7 % |                  |
| COPD                  | No  | 19459 | 95.4 % | 17463 | 89.7 % | 1997 | 10.3 % | 0.417            |
|                       | Yes | 938   | 4.6 %  | 834   | 89.0 % | 104  | 11.0 % |                  |

|                       |     |       |        |       |        |      |        |        |
|-----------------------|-----|-------|--------|-------|--------|------|--------|--------|
| Diabetes mellitus     | No  | 18932 | 92.8 % | 16961 | 89.6 % | 1971 | 10.4 % | 0.051  |
|                       | Yes | 1465  | 7.2 %  | 1336  | 91.2 % | 129  | 8.8 %  |        |
| Stomach ulcer         | No  | 19545 | 95.8 % | 17544 | 89.8 % | 2001 | 10.2 % | 0.194  |
|                       | Yes | 852   | 4.2 %  | 753   | 88.4 % | 99   | 11.6 % |        |
| Urinary incontinence  | No  | 19710 | 96.6 % | 17696 | 89.8 % | 2014 | 10.2 % | 0.051  |
|                       | Yes | 687   | 3.4 %  | 601   | 87.5 % | 86   | 12.5 % |        |
| High cholesterol      | No  | 16617 | 81.5 % | 14954 | 90.0 % | 1663 | 10.0 % | 0.005  |
|                       | Yes | 3780  | 18.5 % | 3343  | 88.4 % | 437  | 11.6 % |        |
| Cataracts             | No  | 18779 | 92.1 % | 16824 | 89.6 % | 1955 | 10.4 % | 0.067  |
|                       | Yes | 1618  | 7.9 %  | 1472  | 91.0 % | 145  | 9.0 %  |        |
| Skin problems         | No  | 19432 | 95.3 % | 17474 | 89.9 % | 1958 | 10.1 % | <0.001 |
|                       | Yes | 965   | 4.7 %  | 823   | 85.3 % | 142  | 14.7 % |        |
| Chronic constipation  | No  | 19572 | 96.0 % | 17596 | 89.9 % | 1975 | 10.1 % | <0.001 |
|                       | Yes | 825   | 4.0 %  | 701   | 84.9 % | 125  | 15.1 % |        |
| Cirrhosis             | No  | 20195 | 99.0 % | 18129 | 89.8 % | 2066 | 10.2 % | <0.001 |
|                       | Yes | 202   | 1.0 %  | 168   | 82.9 % | 35   | 17.1 % |        |
| Depression            | No  | 18918 | 92.7 % | 17043 | 90.1 % | 1874 | 9.9 %  | <0.001 |
|                       | Yes | 1479  | 7.3 %  | 1254  | 84.7 % | 226  | 15.3 % |        |
| Anxiety               | No  | 18836 | 92.3 % | 16996 | 90.2 % | 1839 | 9.8 %  | <0.001 |
|                       | Yes | 1561  | 7.7 %  | 1300  | 83.3 % | 261  | 16.7 % |        |
| Other mental problems | No  | 20109 | 98.6 % | 18036 | 89.7 % | 2072 | 10.3   | 0.732  |
|                       | Yes | 288   | 1.4 %  | 261   | 90.4 % | 28   | 9.6 %  |        |

|                                     |                             |       |        |       |        |      |        |        |
|-------------------------------------|-----------------------------|-------|--------|-------|--------|------|--------|--------|
| Ictus                               | No                          | 20163 | 98.9 % | 18097 | 89.8 % | 2066 | 10.2 % | 0.032  |
|                                     | Yes                         | 234   | 1.1 %  | 200   | 85.5 % | 34   | 14.5 % |        |
| Migraine                            | No                          | 18419 | 90.3 % | 16634 | 90.3 % | 1784 | 9.7 %  | <0.001 |
|                                     | Yes                         | 1978  | 9.7 %  | 1662  | 84.0 % | 316  | 16.0 % |        |
| Haemorrhoids                        | No                          | 19200 | 94.1 % | 17310 | 90.2 % | 1891 | 9.8 %  | <0.001 |
|                                     | Yes                         | 1197  | 5.9 %  | 987   | 82.5 % | 210  | 17.5 % |        |
| Malignant tumours                   | No                          | 19822 | 97.2 % | 17794 | 89.8 % | 2028 | 10.2 % | 0.057  |
|                                     | Yes                         | 575   | 2.8 %  | 503   | 87.4 % | 73   | 12.6 % |        |
| Osteoporosis                        | No                          | 19570 | 95.9 % | 17641 | 90.1 % | 1929 | 9.9 %  | <0.001 |
|                                     | Yes                         | 827   | 4.1 %  | 656   | 79.3 % | 172  | 20.7 % |        |
| Thyroid problems                    | No                          | 19324 | 94.7 % | 17385 | 90.0 % | 1939 | 10.0 % | <0.001 |
|                                     | Yes                         | 1073  | 5.3 %  | 911   | 85.0 % | 161  | 15.0 % |        |
| Permanent injuries due to accidents | No                          | 19300 | 94.6 % | 17454 | 90.4 % | 1846 | 9.6 %  | <0.001 |
|                                     | Yes                         | 1097  | 5.4 %  | 843   | 76.9 % | 254  | 23.1 % |        |
| Accidents (last year)               | No                          | 18699 | 91.7 % | 17035 | 91.1 % | 1665 | 8.9 %  | <0.001 |
|                                     | Yes                         | 1698  | 8.3 %  | 1262  | 74.4 % | 435  | 25.6 % |        |
| GHQ12 mental health                 | Absence of psychopathology  | 17796 | 87.2 % | 16048 | 90.2 % | 1748 | 9.8 %  | <0.001 |
|                                     | Suspicion                   | 994   | 4.9 %  | 872   | 87.8 % | 121  | 12.2 % |        |
|                                     | Presence of psychopathology | 1367  | 6.7 %  | 1169  | 85.5 % | 198  | 14.5 % |        |
|                                     | NR/DK                       | 240   | 1.2 %  | 208   | 86.3 % | 33   | 13.7 % |        |

|                                  |                    |       |        |       |        |      |        |                  |
|----------------------------------|--------------------|-------|--------|-------|--------|------|--------|------------------|
| Activity limitation              | No                 | 18077 | 88.6 % | 16419 | 90.8%  | 1658 | 9.2 %  | <b>&lt;0.001</b> |
| (last 2 weeks)                   | Yes                | 2320  | 11.4 % | 1878  | 80.9 % | 442  | 19.1 % |                  |
| Bed rest                         | No                 | 19297 | 94.6 % | 17372 | 90.0 % | 1925 | 10.0 % | <b>&lt;0.001</b> |
| (last 2 weeks)                   | Yes                | 1100  | 5.4 %  | 925   | 84.0 % | 176  | 16.0 % |                  |
| Activity limitation              | Severely limited   | 672   | 3.3 %  | 544   | 80.9 % | 129  | 19.1 % | <b>&lt;0.001</b> |
| (last 6 months)                  | Non-severe limited | 3238  | 15.9 % | 2621  | 81.0 % | 617  | 19.0 % |                  |
|                                  | Not limited        | 16487 | 80.8 % | 15132 | 91.8 % | 1355 | 8.2 %  |                  |
| Use of glasses or contact lenses | No                 | 7953  | 39.0 % | 7235  | 91.0 % | 718  | 9.0 %  | <b>&lt;0.001</b> |
|                                  | Yes                | 12444 | 61.0 % | 11062 | 88.9 % | 1382 | 11.1 % |                  |
| Use of glasses or contact lenses | No                 | 19764 | 96.9 % | 17738 | 89.8 % | 2026 | 10.2 % | 0.198            |
| Use of hearing aid               | Yes                | 633   | 3.1 %  | 559   | 88.2 % | 75   | 11.8 % |                  |
| Hospital admission               | No                 | 18702 | 91.7 % | 16914 | 90.4 % | 1788 | 9.6 %  | <b>&lt;0.001</b> |
| (last year)                      | Yes                | 1695  | 8.3 %  | 1383  | 81.6 % | 312  | 18.4 % |                  |
| General practitioner visit       | No                 | 14678 | 72.0 % | 13270 | 90.4 % | 1408 | 9.6 %  | <b>&lt;0.001</b> |
| (last month)                     | Yes                | 5719  | 28.0 % | 5027  | 87.9 % | 692  | 12.1 % |                  |
| Specialist visit                 | No                 | 17330 | 85.0 % | 15817 | 91.3 % | 1513 | 8.7 %  | <b>&lt;0.001</b> |
| (last month)                     | Yes                | 3067  | 15.0 % | 2479  | 80.8 % | 587  | 19.2 % |                  |
| Day hospital                     | No                 | 18858 | 92.5 % | 17021 | 90.3 % | 1836 | 9.7 %  | <b>&lt;0.001</b> |
| (last year)                      | Yes                | 1539  | 7.5 %  | 1275  | 82.9 % | 264  | 17.1 % |                  |



|                    |     |       |        |       |        |      |        |                  |
|--------------------|-----|-------|--------|-------|--------|------|--------|------------------|
| Emergency visits   | No  | 14926 | 73.2 % | 13735 | 92.0 % | 1191 | 8.0 %  | <b>&lt;0.001</b> |
| (last year)        | Yes | 5471  | 26.8 % | 4562  | 83.4 % | 910  | 16.6 % |                  |
| Psychologist visit | No  | 19700 | 96.6 % | 17769 | 90.2 % | 1931 | 9.8 %  | <b>&lt;0.001</b> |
| (last year)        | Yes | 697   | 3.4 %  | 528   | 75.7 % | 169  | 24.3 % |                  |
| X-ray              | No  | 14831 | 72.7 % | 13961 | 94.1 % | 870  | 5.9 %  | <b>&lt;0.001</b> |
| (last year)        | Yes | 5566  | 27.3 % | 4335  | 77.9 % | 1230 | 22.1 % |                  |
| CT scan            | No  | 18861 | 92.5 % | 17126 | 90.8 % | 1735 | 9.2 %  | <b>&lt;0.001</b> |
| (last year)        | Yes | 1536  | 7.5 %  | 1171  | 76.2 % | 365  | 23.8 % |                  |
| Ultrasound         | No  | 17472 | 85.7 % | 15885 | 90.9 % | 1586 | 9.1 %  | <b>&lt;0.001</b> |
| (last year)        | Yes | 2925  | 14.3 % | 2411  | 82.4 % | 514  | 17.6 % |                  |
| MRI                | No  | 18884 | 92.6 % | 17275 | 91.5 % | 1608 | 8.5 %  | <b>&lt;0.001</b> |
| (last year)        | Yes | 1513  | 7.4 %  | 1021  | 67.5 % | 492  | 32.5 % |                  |
| Influenza vaccine  | No  | 16610 | 81.4 % | 14875 | 89.6 % | 1736 | 10.4 % | <b>&lt;0.001</b> |
| (last campaign)    | Yes | 3787  | 18.6 % | 3422  | 90.4 % | 365  | 9.6 %  |                  |

BMI: Body Mass Index; VT: Vocational Training; AH: Arterial hypertension; AMI: Acute Myocardial Infarction; COPD: Chronic Obstructive Pulmonary Disease; GHQ: General Health Questionnaire; CT scan: Computed Axial Tomography; MRI: Magnetic Resonance Imaging.

Table S3. Cumulative incidence of total mortality at 6 years according to explanatory variables.

|                             |                      | Éxitus No |        | Éxitus Yes |       | p-value |
|-----------------------------|----------------------|-----------|--------|------------|-------|---------|
|                             |                      | n         | %      | n          | %     |         |
| Physiotherapist (last year) | No                   | 17264     | 94.4 % | 1033       | 5.6 % | <0.001  |
|                             | Yes                  | 2026      | 96.5 % | 74         | 3.5 % |         |
| Autonomous community        | Andalucía            | 3431      |        | 227        | 6.2 % | 0.002   |
|                             | Aragón               | 553       |        | 36         | 6.0 % |         |
|                             | Asturias             | 447       |        | 38         | 7.9 % |         |
|                             | Baleares             | 453       |        | 24         | 5.1 % |         |
|                             | Canarias             | 887       |        | 44         | 4.7 % |         |
|                             | Cantabria            | 251       |        | 12         | 4.6 % |         |
|                             | Castilla y León      | 1052      |        | 91         | 8.0 % |         |
|                             | Castilla La-Mancha   | 863       |        | 55         | 6.0 % |         |
|                             | Cataluña             | 2934      |        | 135        | 4.4 % |         |
|                             | Comunidad Valenciana | 2118      |        | 116        | 5.2 % |         |
|                             | Extremadura          | 451       |        | 30         | 6.2 % |         |
|                             | Galicia              | 1190      |        | 64         | 5.1 % |         |
|                             | Madrid               | 2670      |        | 134        | 4.8 % |         |
|                             | Murcia               | 622       |        | 28         | 4.3 % |         |
|                             | Navarra              | 266       |        | 50         | 4.5 % |         |
|                             | País Vasco           | 911       |        | 9          | 5.2 % |         |
|                             | La Rioja             | 132       |        | 1          |       |         |

|  |         |    |  |  |       |  |
|--|---------|----|--|--|-------|--|
|  |         |    |  |  | 6.2 % |  |
|  |         |    |  |  | 3.4%  |  |
|  |         |    |  |  | 4.0%  |  |
|  | Ceuta   | 29 |  |  |       |  |
|  | Melilla | 30 |  |  |       |  |

|                        |                              |       |        |      |       |        |
|------------------------|------------------------------|-------|--------|------|-------|--------|
| Breakfast              | At home                      | 16243 | 94.0 % | 1045 | 6.0 % | <0.001 |
|                        | Away from home               | 2287  | 98.0 % | 47   | 2.0 % |        |
|                        | Don't usually have breakfast | 760   | 98.1 % | 15   | 1.9 % |        |
| Fruit consumption      | Daily                        | 11655 | 93.8 % | 772  | 6.2 % | <0.001 |
|                        | > 3 times/week               | 3774  | 95.4 % | 182  | 4.6 % |        |
|                        | once-twice/week              | 2185  | 96.1 % | 88   | 3.9 % |        |
|                        | < once/week                  | 761   | 96.8 % | 25   | 3.2 % |        |
|                        | Never or hardly ever         | 914   | 95.9 % | 39   | 4.1 % |        |
| Vegetables consumption | Daily                        | 9053  | 94.6 % | 513  | 5.4 % | 0.427  |
|                        | > 3 times/week               | 6595  | 94.3 % | 395  | 5.7 % |        |
|                        | once-twice/week              | 2622  | 95.0 % | 139  | 5.0 % |        |
|                        | < once/week                  | 657   | 95.2 % | 33   | 4.8 % |        |
|                        | Never or hardly ever         | 363   | 93.0 % | 27   | 7.0 % |        |
| Legume consumption     | Daily                        | 298   | 95.5 % | 14   | 4.5 % | 0.046  |
|                        | > 3 times/week               | 4449  | 93.9 % | 289  | 6.1 % |        |
|                        | once-twice/week              | 11515 | 94.7 % | 646  | 5.3 % |        |

|                   |                       |       |        |     |        |        |
|-------------------|-----------------------|-------|--------|-----|--------|--------|
|                   | < once/week           | 2290  | 95.4 % | 109 | 4.6 %  |        |
|                   | Never or hardly ever  | 737   | 93.8 % | 49  | 6.2 %  |        |
| Dairy consumption | Daily                 | 16281 | 94.5 % | 950 | 5.5 %  | 0.019  |
|                   | > 3 times/week        | 1487  | 95.5 % | 70  | 4.5 %  |        |
|                   | once-twice/week       | 677   | 96.3 % | 26  | 3.7 %  |        |
|                   | < once/week           | 328   | 94.2 % | 20  | 5.8 %  |        |
| Sweet consumption | Never or hardly ever  | 517   | 92.5 % | 42  | 7.5 %  |        |
|                   | Daily                 | 5587  | 94.3 % | 337 | 5.7 %  | <0.001 |
|                   | > 3 times/week        | 2977  | 95.9 % | 127 | 4.1 %  |        |
|                   | once-twice/week       | 3532  | 95.3 % | 176 | 4.7 %  |        |
|                   | < once/week           | 3134  | 95.6 % | 144 | 4.4 %  |        |
|                   | Never or hardly ever  | 4060  | 92.6 % | 322 | 7.4 %  |        |
| Fast food         | Daily                 | 358   | 99.6 % | 1   | 0.4 %  | <0.001 |
|                   | > 3 times/week        | 904   | 98.4 % | 14  | 1.6 %  |        |
|                   | once-twice/week       | 4017  | 98.5 % | 61  | 1.5 %  |        |
|                   | < once/week           | 4764  | 98.0 % | 97  | 2.0 %  |        |
|                   | Never or hardly ever  | 9246  | 90.8 % | 933 | 9.2 %  |        |
| Dental hygiene    | 3 or more times/day   | 7523  | 97.0 % | 236 | 3.0 %  | <0.001 |
|                   | > twice/day           | 6449  | 95.7 % | 289 | 4.3 %  |        |
|                   | once/day              | 3731  | 92.5 % | 304 | 7.5 %  |        |
|                   | Never or occasionally | 1587  | 85.1 % | 279 | 14.9 % |        |

|                       |           |       |        |     |        |                  |
|-----------------------|-----------|-------|--------|-----|--------|------------------|
| Self-perceived health | Very good | 4353  | 99.0 % | 43  | 1.0 %  | <b>&lt;0.001</b> |
|                       | Good      | 10116 | 97.1 % | 297 | 2.9 %  |                  |
|                       | Fair      | 3651  | 89.8 % | 414 | 10.2 % |                  |
|                       | Bad       | 966   | 78.9 % | 258 | 21.1 % |                  |
|                       | Very bad  | 204   | 68.4 % | 94  | 31.6 % |                  |
| Any chronic disease   | No        | 11578 | 97.9 % | 245 | 2.1 %  | <b>&lt;0.001</b> |
|                       | Yes       | 7712  | 89.9 % | 862 | 10.1 % |                  |
| AH                    | No        | 15566 | 96.6 % | 553 | 3.4 %  | <b>&lt;0.001</b> |
|                       | Yes       | 3724  | 87.0 % | 554 | 13.0 % |                  |
| AMI                   | No        | 19007 | 95.1 % | 990 | 4.9 %  | <b>&lt;0.001</b> |
|                       | Yes       | 283   | 70.7 % | 117 | 29.3 % |                  |
| Other heart disease   | No        | 18382 | 95.6 % | 845 | 4.4 %  | <b>&lt;0.001</b> |
|                       | Yes       | 908   | 77.6 % | 262 | 22.4 % |                  |
| Varicose veins        | No        | 17200 | 95.1 % | 887 | 4.9 %  | <b>&lt;0.001</b> |
|                       | Yes       | 2090  | 90.5 % | 220 | 9.5 %  |                  |
| Osteoarthritis        | No        | 16101 | 96.6 % | 562 | 3.4 %  | <b>&lt;0.001</b> |
|                       | Yes       | 3189  | 85.4 % | 545 | 14.6 % |                  |
| Chronic neck pain     | No        | 16252 | 95.3 % | 801 | 4.7 %  | <b>&lt;0.001</b> |
|                       | Yes       | 3038  | 90.9 % | 306 | 9.1 %  |                  |
| Chronic low back pain | No        | 15682 | 95.5 % | 746 | 4.5 %  | <b>&lt;0.001</b> |
|                       | Yes       | 3608  | 90.9 % | 361 | 9.1 %  |                  |

|                      |     |       |        |      |        |        |
|----------------------|-----|-------|--------|------|--------|--------|
| Allergy              | No  | 16899 | 94.3 % | 1022 | 5.7 %  | <0.001 |
|                      | Yes | 2391  | 96.6 % | 85   | 3.4 %  |        |
| Asthma               | No  | 18337 | 94.7 % | 1022 | 5.3 %  | <0.001 |
|                      | Yes | 953   | 91.8 % | 85   | 8.2 %  |        |
| COPD                 | No  | 18552 | 95.3 % | 907  | 4.7 %  | <0.001 |
|                      | Yes | 738   | 78.7 % | 200  | 21.3 % |        |
| Diabetes mellitus    | No  | 18092 | 95.6 % | 841  | 4.4 %  | <0.001 |
|                      | Yes | 1198  | 81.8 % | 266  | 18.2 % |        |
| Stomach ulcer        | No  | 18534 | 94.8 % | 1011 | 5.2 %  | <0.001 |
|                      | Yes | 756   | 88.7 % | 96   | 11.3 % |        |
| Urinary incontinence | No  | 18815 | 95.5 % | 895  | 4.5 %  | <0.001 |
|                      | Yes | 475   | 69.1 % | 212  | 30.9 % |        |
| High cholesterol     | No  | 15828 | 95.3 % | 789  | 4.7 %  | <0.001 |
|                      | Yes | 3462  | 91.6 % | 318  | 8.4 %  |        |
| Cataracts            | No  | 18067 | 96.2 % | 712  | 3.8 %  | <0.001 |
|                      | Yes | 1223  | 75.6 % | 395  | 24.4 % |        |
| Skin problems        | No  | 18408 | 94.7 % | 1024 | 5.3 %  | <0.001 |
|                      | Yes | 882   | 91.4 % | 83   | 8.6 %  |        |
| Chronic constipation | No  | 18588 | 95.0 % | 984  | 5.0 %  | <0.001 |
|                      | Yes | 702   | 85.1 % | 123  | 14.9 % |        |
| Cirrhosis            | No  | 19126 | 94.7 % | 1068 | 5.3 %  | <0.001 |

|                                     |     |       |        |      |        |        |
|-------------------------------------|-----|-------|--------|------|--------|--------|
|                                     | Yes | 163   | 80.8 % | 39   | 19.2 % |        |
| Depression                          | No  | 17986 | 95.1 % | 932  | 4.9 %  | <0.001 |
|                                     | Yes | 1304  | 88.2 % | 175  | 11.8 % |        |
| Anxiety                             | No  | 17858 | 94.8 % | 977  | 5.2 %  | <0.001 |
|                                     | Yes | 1431  | 91.7 % | 130  | 8.3 %  |        |
| Other mental problems               | No  | 19098 | 95.0 % | 1011 | 5.0 %  | <0.001 |
|                                     | Yes | 192   | 66.5 % | 97   | 33.5 % |        |
| Ictus                               | No  | 19133 | 94.9 % | 1030 | 5.1 %  | <0.001 |
|                                     | Yes | 157   | 67.0 % | 77   | 33.0 % |        |
| Migraine                            | No  | 17413 | 94.5 % | 1006 | 5.5 %  | 0.507  |
|                                     | Yes | 1877  | 94.9 % | 101  | 5.1 %  |        |
| Haemorrhoids                        | No  | 18199 | 94.8 % | 1001 | 5.2 %  | <0.001 |
|                                     | Yes | 1091  | 91.2 % | 106  | 8.8 %  |        |
| Malignant tumours                   | No  | 18852 | 95.1 % | 969  | 4.9 %  | <0.001 |
|                                     | Yes | 438   | 76.1 % | 138  | 23.9 % |        |
| Osteoporosis                        | No  | 18606 | 95.1 % | 964  | 4.9 %  | <0.001 |
|                                     | Yes | 684   | 82.7 % | 143  | 17.3 % |        |
| Thyroid problems                    | No  | 18281 | 94.6 % | 1043 | 5.4 %  | 0.425  |
|                                     | Yes | 1009  | 94.1 % | 64   | 5.9 %  |        |
| Permanent injuries due to accidents | No  | 18265 | 94.6 % | 1035 | 5.4 %  | 0.088  |
|                                     | Yes | 1025  | 93.4 % | 72   | 6.6 %  |        |

|                                            |                             |       |        |      |        |        |
|--------------------------------------------|-----------------------------|-------|--------|------|--------|--------|
| Accidents<br>(last year)                   | No                          | 17700 | 94.7 % | 999  | 5.3 %  | 0.076  |
|                                            | Yes                         | 1590  | 93.6 % | 108  | 6.4 %  |        |
| GHQ12 mental health                        | Absence of psychopathology  | 17007 | 95.6 % | 788  | 4.4 %  | <0.001 |
|                                            | Suspicion                   | 930   | 93.6 % | 64   | 6.4 %  |        |
|                                            | Presence of psychopathology | 1184  | 86.6 % | 183  | 13.4 % |        |
|                                            | NR/DK                       | 169   | 70.3 % | 71   | 29.7 % |        |
| Activity limitation<br>(last 2 weeks)      | No                          | 17266 | 95.5 % | 811  | 4.5 %  | <0.001 |
|                                            | Yes                         | 2024  | 87.2 % | 296  | 12.8 % |        |
| Bed rest<br>(last 2 weeks)                 | No                          | 18346 | 95.1 % | 951  | 4.9 %  | <0.001 |
|                                            | Yes                         | 944   | 85.8 % | 156  | 14.2 % |        |
| Activity limitation<br>(last 6 months)     | Severely limited            | 430   | 64.0 % | 242  | 36.0 % | <0.001 |
|                                            | Non-severe limited          | 2866  | 88.5 % | 372  | 11.5 % |        |
|                                            | Not limited                 | 15994 | 97.0 % | 493  | 3.0 %  |        |
| Use of glasses or contact lenses           | No                          | 7721  | 97.1 % | 232  | 2.9 %  | <0.001 |
|                                            | Yes                         | 11569 | 93.0 % | 875  | 7.0 %  |        |
| Use of hearing aid                         | No                          | 18763 | 94.9 % | 1000 | 5.1 %  | <0.001 |
|                                            | Yes                         | 527   | 83.1 % | 107  | 16.9 % |        |
| Hospital admission<br>(last year)          | No                          | 17855 | 95.5 % | 847  | 4.5 %  | <0.001 |
|                                            | Yes                         | 1435  | 84.6 % | 260  | 15.4 % |        |
| General practitioner visit<br>(last month) | No                          | 14085 | 96.0 % | 593  | 4.0 %  | <0.001 |
|                                            | Yes                         | 5205  | 91.0 % | 514  | 9.0 %  |        |



|                    |     |       |        |      |        |        |
|--------------------|-----|-------|--------|------|--------|--------|
| Specialist visit   | No  | 16497 | 95.2 % | 834  | 4.8 %  | <0.001 |
| (last month)       | Yes | 2793  | 91.1 % | 273  | 8.9 %  |        |
| Day hospital       | No  | 17901 | 94.9 % | 957  | 5.1 %  | <0.001 |
| (last year)        | Yes | 1389  | 90.3 % | 150  | 9.7 %  |        |
| Emergency visits   | No  | 14236 | 95.4 % | 690  | 4.6 %  | <0.001 |
| (last year)        | Yes | 5054  | 92.4 % | 417  | 7.6 %  |        |
| Psychologist visit | No  | 18634 | 94.6 % | 1066 | 5.4 %  | <0.001 |
| (last year)        | Yes | 656   | 94.1 % | 41   | 5.9 %  |        |
| X-ray              | No  | 14173 | 95.6 % | 658  | 4.4 %  | <0.001 |
| (last year)        | Yes | 5117  | 91.9 % | 449  | 8.1 %  |        |
| CT Scan            | No  | 17976 | 95.3 % | 885  | 4.7 %  | <0.001 |
| (last year)        | Yes | 1314  | 85.5 % | 222  | 14.5 % |        |
| Ultrasound         | No  | 16594 | 95.0 % | 878  | 5.0 %  | <0.001 |
| (last year)        | Yes | 2696  | 92.2 % | 229  | 7.8 %  |        |
| MRI                | No  | 17926 | 94.9 % | 958  | 5.1 %  | <0.001 |
| (last year)        | Yes | 1364  | 90.1 % | 149  | 9.9 %  |        |
| Influenza vaccine  | No  | 16123 | 97.1 % | 487  | 2.9 %  | <0.001 |
| (last campaign)    | Yes | 3167  | 83.6 % | 620  | 16.4 % |        |

BMI: Body Mass Index; VT: Vocational Training; AH: Arterial hypertension; AMI: Acute Myocardial Infarction; COPD: Chronic Obstructive Pulmonary Disease; GHQ: General Health Questionnaire; CT scan: Computed Axial Tomography; MRI: Magnetic Resonance Imaging.

Table S4. Relative Risks estimated by Poisson models with robust variance.

|                                   |                              | RR    | CI 95%        | p-value |
|-----------------------------------|------------------------------|-------|---------------|---------|
| Physiotherapist visit (last year) | Yes                          | 0.699 | (0.528-0.927) | 0.013   |
| BMI                               | Normal                       |       |               |         |
|                                   | Overweight                   | 0.832 | (0.699-0.992) | 0.040   |
|                                   | Obesity                      | 0.936 | (0.77-1.137)  | 0.504   |
|                                   | NR/DK                        | 1.081 | (0.905-1.291) | 0.391   |
| Marital status                    | Single                       |       |               |         |
|                                   | Married                      | 0.617 | (0.488-0.779) | <0.001  |
|                                   | Widowed                      | 0.758 | (0.602-0.955) | 0.019   |
|                                   | Separated                    | 0.770 | (0.505-1.174) | 0.225   |
|                                   | Divorced                     | 0.703 | (0.389-1.271) | 0.243   |
| Net monthly household income      | NR/DK                        |       |               |         |
|                                   | > € 2251                     | 1.081 | (0.792-1.475) | 0.624   |
|                                   | € 1551-2250                  | 0.875 | (0.69-1.11)   | 0.272   |
|                                   | € 1051-1550                  | 0.955 | (0.779-1.171) | 0.657   |
|                                   | € 801-1050                   | 0.915 | (0.74-1.132)  | 0.415   |
|                                   | < € 800                      | 0.935 | (0.789-1.109) | 0.441   |
| Tobacco consumption               | Never                        |       |               |         |
|                                   | Ex-smoker                    | 1.085 | (0.903-1.305) | 0.384   |
|                                   | Smoker                       | 1.479 | (1.161-1.883) | 0.002   |
| Main activity daily               | Sitting most of the time     |       |               |         |
|                                   | Standing most of the time    | 0.659 | (0.544-0.799) | <0.001  |
|                                   | Walking with weight          | 0.756 | (0.521-1.097) | 0.141   |
|                                   | Strenuous tasks              | 0.607 | (0.201-1.834) | 0.376   |
| Leisure physical activity         | Sedentary                    |       |               |         |
|                                   | Occasional physical activity | 0.738 | (0.619-0.88)  | 0.001   |
|                                   | Frequent physical activity   | 0.592 | (0.337-1.039) | 0.068   |
|                                   | Sports training              | 0.631 | (0.391-1.018) | 0.059   |

|                                         |                       |       |               |         |
|-----------------------------------------|-----------------------|-------|---------------|---------|
| Legume consumption                      | Daily                 |       |               |         |
|                                         | > 3 times/week        | 0.998 | (0.589-1.691) | 0.995   |
|                                         | once-twice/week       | 0.968 | (0.577-1.624) | 0.902   |
|                                         | < once/week           | 0.958 | (0.549-1.672) | 0.881   |
|                                         |                       | RR    | CI 95%        | p-value |
|                                         | Never or hardly ever  | 1.395 | (0.789-2.468) | 0.253   |
| Dental Hygiene                          | 3 or more times/day   |       |               |         |
|                                         | twice/day             | 1.326 | (1.092-1.61)  | 0.004   |
|                                         | once/day              | 1.140 | (0.948-1.372) | 0.164   |
|                                         | Never or occasionally | 1.275 | (1.054-1.543) | 0.012   |
| Self-perceived health                   | Very good             |       |               |         |
|                                         | Good                  | 1.437 | (0.949-2.175) | 0.086   |
|                                         | Fair                  | 1.994 | (1.31-3.035)  | 0.001   |
|                                         | Bad                   | 2.307 | (1.494-3.563) | <0.001  |
|                                         | Very bad              | 2.609 | (1.65-4.125)  | <0.001  |
| SEX                                     | Woman                 | 0.605 | (0.504-0.726) | <0.001  |
| AGE                                     | (years old)           | 1.080 | (1.072-1.088) | <0.001  |
| Any chronic disease                     | Yes                   | 1.024 | (0.862-1.217) | 0.784   |
| AMI                                     | Yes                   | 1.446 | (1.158-1.805) | 0.001   |
| Allergy                                 | Yes                   | 0.749 | (0.594-0.945) | 0.015   |
| COPD                                    | Yes                   | 1.297 | (1.099-1.531) | 0.002   |
| DM                                      | Yes                   | 1.294 | (1.118-1.497) | 0.001   |
| High cholesterol                        | Yes                   | 0.751 | (0.65-0.867)  | <0.001  |
| Depression                              | Yes                   | 1.181 | (0.977-1.427) | 0.085   |
| Malignant tumours                       | Yes                   | 1.437 | (1.16-1.778)  | 0.001   |
| Osteoporosis                            | Yes                   | 1.075 | (0.89-1.298)  | 0.456   |
| Activity limitation (last 2 weeks)      | Yes                   | 1.088 | (0.93-1.272)  | 0.294   |
| Hospital admission (last year)          | Yes                   | 1.075 | (0.905-1.277) | 0.410   |
| General practitioner visit (last month) | Yes                   | 0.939 | (0.827-1.066) | 0.333   |
| Specialist visit (last month)           | Yes                   | 1.039 | (0.89-1.214)  | 0.625   |
| Day hospital visit (last year)          | Yes                   | 1.066 | (0.888-1.281) | 0.493   |
| CT scan (last year)                     | Yes                   | 1.103 | (0.896-1.356) | 0.355   |

|                        |     |       |               |       |
|------------------------|-----|-------|---------------|-------|
| Ultrasound (last year) | Yes | 1.173 | (0.956-1.439) | 0.126 |
| MRI (last year)        | Yes | 1.161 | (0.933-1.446) | 0.181 |

BMI: Body Mass Index; AMI: Acute Myocardial Infarction; COPD: Chronic Obstructive Pulmonary Disease; DM: Diabetes Mellitus; CT scan: Computed Axial Tomography scan. n train = 14191; n° deaths train= 1040; LRT=2102.2 (p<0.001); n test = 6206; n° deaths test = 439; ROC test area= 0.921; 95% CI= (0.908-0.933)
